# Supplementary material
Source: PubMed Central journal article supplement (PMC544900)
Supplement: 7600460s1.pdf [file 7600460s1.pdf]

## SUPPLEMENTARY MATERIAL

**Oligonucleotide Array-QC-Labeling and sample processing.** High density oligonucleotide Affymetrix U133A chips, representing approximately 22,000 genes and 1,000 ESTs, were used in this study according to manufacturer's protocols. U133A microarray data from human OEAs will be published elsewhere (Cho laboratory, manuscript in preparation). RNA quality control was performed prior to labeling: 25 to 50 nanograms of total RNA was run on a RNA 6000 Nano Assay (Agilent, Palo Alto, CA) using a Bioanalyzer 2100. 2 µg of total RNA was then labeled according to protocols recommended by manufacturers. Briefly, after reverse transcription with an oligo-(dT)<sub>24</sub>-T7 (Genset), double stranded cDNA was generated with the Superscript double stranded cDNA synthesis custom kit (Invitrogen Life Technologies, Carlsbad, CA). In an in vitro transcription step (IVT) with T7 RNA polymerase (MessageAmp aRNA kit from Ambion, Austin, TX), the cDNA was linearly amplified and labeled with biotinylated nucleotides (Enzo Diagnostics, Farmingdale, NY). 10 µg of labeled and fragmented cRNA was then hybridized onto a human genome U133A expression array (Affymetrix) for 16 hours at 45°C. Post-hybridization fluorescent staining was processed according to the manufacturer's instruction (Affymetrix). Finally, chips were scanned with a Hewlett Packard argon-ion laser confocal scanner. The image was quantified using Microarray Suite 5.1 (MAS 5.1, Affymetrix) with the default parameters for the statistical algorithm.

**RT-PCR.** Total RNA from cells was isolated using Qiagen RNeasy Kits according to manufacturer instructions. Total RNA from frozen tissues was isolated using Trizol (Invitrogen). RT-PCR was performed using Superscript One-Step RT-PCR (Invitrogen). Primers used for our studies were: human *FGF20*, forward 5'-

AGGTGTGGACAGTGGTCTC-3' and reverse 5'-TTTCCAAATCCAGTCTCT CAAG-3'; mouse *Fgf20*, forward 5'-GGCAGGATCACAGTCTCTTCG-3' and reverse 5'-AGTTCCATCCTTGTTAAGTGC-3'; rat *Fgf20*, forward 5'-ATCACAGCCTCTTCGGTATCC-3' and reverse 5'-TCCAGTGTACACCAGTAGGTC-3'; human *DKK1*, forward 5'-CAGTAATTCTTCTAGGCTTCA C-3' and reverse 5'-CAAGAGATCCTT GCGTTCTAGGAC-3'; human *LMO2*, forward 5'-GAGGACTGCCTGAGCTGCGAC-3' and reverse 5'-TATCATCCCATTGATCTTAGTC-3'; human *ETV5*, forward 5'-TTA GAGACGCTGAAAGCACC-3' and reverse 5'-AAGCCTCTTGAAGTTGACTGAG-3'; human *RBPI*, forward 5'-CTCCAGTCACTCCCGAAATG-3' and reverse 5'-GGACAT TTTTGCCTCATGCT-3'; human *GAPDH*, forward 5'-CAACAGCCTCAAGATCATCAGC-3' and reverse 5'-CTCCCCAGCAGTGAGGGTCTCTC-3'; mouse *Actin*, forward 5'-TCATGAAGTGTGACGTTGACATCCGT-3' and reverse 5'-CTTAGAAGCATTGGTGCACGATG-3'; rat *GAPDH*, forward 5'-CAATGGCACAGTCAAGGCTGAG-3' and reverse 5'-GGTCTGGGATGGAATTGTGAG-3'. All primer pairs amplified correct size product with an annealing temperature of 55°C. Amplification of *FGF20* usually required between 36 and 40 cycles, *GAPDH* between 18 and 22 cycles. All other genes required between 30 and 34 cycles. All products were verified by DNA sequencing. 0.2 to 0.5ug of total RNA was routinely used in RT-PCR.

**ChIP assays.** Chromatin fixation and immunoprecipitation were performed as previously described (Orlando *et al*, 2000; Weinmann A.S. *et al*, 2001) with some modifications.

Briefly, formaldehyde was added directly to cell culture media of log phase adherent  $3 \times 10^7$  293Top cells for 10 minutes at room temperature. Cross-linking was quenched by the addition of glycine to a final concentration of 0.125M. Cells were washed three times with PBS, scraped off the plates in small amount of PBS, centrifuged, and the pellet was washed once with PBS containing protease inhibitors (Complete, Roche). Cells were then resuspended in 1 ml lysis buffer (5mM PIPES pH 8, 85mMKCl, 0.5% NP40 and protease inhibitors). incubated on ice for 10 minutes, and dounced with twenty strokes to release nuclei. Cell lysates were centrifuged at 5,000 rpm for 5 minutes at 4°C, and the pelleted nuclei were resuspended in 1 ml nuclei lysis buffer (50mM Tris-HCl pH8, 10mM EDTA, 1% SDS and protease inhibitors), centrifuged and resuspended again in 1 ml nuclei lysis buffer, and incubated on ice for 10 minutes. Prior to sonication, 0.2 grams of glass beads was added to the sample, and the sample was sonicated to obtain approximately 1 Kb chromatin fragments. After sonication, the sample was centrifuged at top speed for 10 minutes at 4°C in an Eppendorf centrifuge. The supernatant was diluted 1:10 with IP dilution buffer (50mM Tris-HCL pH8, 2mMEDTA, 200mM NaCl, 1% Triton-X-100 and proteinase inhibitors). 400 ul of 50% slurry of salmon sperm-coated Protein A-agarose beads was added for 30 minutes on ice and then centrifuged to pre-clear chromatin and prevent non-specific binding. Then, either 3ul polyclonal rabbit anti-  $\beta$ -catenin antibody (Santa Cruz Antibodies) or polyclonal rabbit anti-K-ras (Santa Cruz Antibodies) to 1ml of pre-cleared chromatin and incubated overnight at 4°C with gentle agitation. After addition of 40ul of salmon sperm-coated Protein A-agarose beads and incubation for 2 hours at 4°C, beads were washed twice with 50mM Tris-HCl pH 8, 2mM EDTA, 0.2% Sarkosyl and twice with 100mM Tris-HCl, 500mM LiCl, 1% NP40 and 1%

deoxycholate. Immunoprecipitated chromatin was eluted from beads by the addition of 50 mM NaHCO<sub>3</sub>, 1% SDS for 5 minutes at room temperature. Reversal of crosslinking before PCR amplification has been previously described. Primers used to amplify precipitated samples: human *FGF20* promoter, forward 5'-CTTTCATGTGTGTCTGGGCAGGTC-3' and reverse 5'-CTTAAACCGGTCTCCTCTCAAC-3'; human *DKK1* promoter, forward 5'-GGCCACTTTGATCTCACGCGTC-3' and reverse 5'-CTGGAACTTGGGTGCCCTTGCC-3'; human *CCND1* promoter, forward 5'-CCTCCCGCTCCCATCTCTGCC-3' and reverse 5'-GCGGATGGT TTCCACTTCGCAG-3'; human *GAPDH* promoter, forward 5'-CAGACCACAGTCCATGCCATCAC-3' and reverse 5'-CCATGAGGTCCACCACCTGTTGC-3'; pOT promoter, forward 5'-CGATAGTACTAACATACGCTC-3' and reverse 5'-TTATGCAGTTGCTCTCCAGCG-3'.

**Expression constructs, luciferase reporter constructs and assays.** DNA fragments encoding ICAT and the E-cadherin intracellular domain were cloned into pcDNA3 (Invitrogen) under the control of the cytomegalovirus (CMV) promoter. The plasmid expressing  $\beta$ -cateninS37A under the control of the CMV (pMH-  $\beta$ -cateninS37A) has been previously described (Zorn et al.1999). pDKK1-*luciferase* and pFGF20-*luciferase* reporters were constructed by inserting PCR-generated fragments containing regions 5' to the translational start sites of the human *Dkk1* gene (-1068 to+43) and the human *FGF20* gene (-888 to +43) into the Kpn1 and Xma1 sites of the pGL3basic vector (Promega). 5' deletions of pDKK1-*luciferase* were also generated using PCR. Putative TCF binding

sites were mutated using QuickChange Site Directed Mutagenesis Kit (Stratagene).

Mutating oligos used: DKK1 promoter TCF site 1,

5'-CCCATCCCGGC<sub>cg</sub>TGTTGTCTCCCTCC-3', TCF site 2,

5'-CCTCCCAGCGC<sub>gc</sub>TGAAATCCCATCC-3'; *FGF20* promoter TCF site1,

5'-CAAAGCTCACATCA<sub>cgt</sub>ACGGTTGCACGG-3', TCF site 2,

5'-GTTAAACTGTCAAAGCaTcGATTTTTCTTTCATG-3'. Mutations are represented

in lower case letters and the TCF sites are underlined. Luciferase assays on reporter constructs to measure  $\beta$ -catenin transcriptional activity were performed in triplicate.

Briefly, 293 cells were plated in 12 well dishes and transfected with pDKK1-*luciferase* or pFGF20-*luciferase* reporters using calcium phosphate. Cells were co-transfected with a CMV-driven *Renilla luciferase* construct to normalize for variations in transfection efficiencies. We routinely used 0.1ug of the *luciferase* reporter construct, 0.025ug of the CMV-*Renilla* construct, and 0.3ug of effector plasmid. pCDNA was used to keep amounts of DNA constant in the transfection assays. After 48 hours of incubation, transfected cells were washed with PBS and lysed in 200ul dual luciferase lysis buffer (Promega). Luciferase activity was measured using the dual luciferase assay kit according to Promega's instructions.

**Western Analysis.** Protein lysates were resolved in 4-20% polyacrylamide gels containing SDS and transferred to nitrocellulose. After incubating with mouse monoclonal antibodies against V5-tag (Invitrogen, 1:5,000) or  $\gamma$ -tubulin (Sigma 1:5,000), the reaction was visualized by peroxidase-conjugated secondary antibodies (Roche, 1:10,000) and a chemiluminescent substrate (Pierce, SuperSignal West Femto).

***Xenopus* embryo manipulations and RNA transcription.** RNA for DN Xtcf-3, VP16

Xtcf-3 (Vonica et al. 2000), TVGR (Darken et al. 2001), and Xombi/VegT (Lustig, 1996) were prepared with an mMessage mMachine in vitro SP6 transcription kit from Ambion. RNA injections were performed in 10 nl volume as indicated. Cap assays were performed on animal caps dissected at stage 9.5. For the cycloheximide and dexamethasone treatment experiment, embryos were injected at the 2-cell stage in both blastomeres with 20 pg TVGR RNA, animal caps were cut at stage 9, treated with cycloheximide (5 µg/ml) for 30 minutes prior to addition of dexamethasone (10 µM) for another 30 minutes collected for RT-PCR processing. RT-PCR analysis was performed as described (Wilson et al. 1994), using DNA amplified from ornithine decarboxylase (*ODC*) RNA as loading control. RT-PCR primers for *XFGF-20* were sense 5' -

GGCTCCTCTGGCCGACGTGGG-3' and antisense 5'-CGACCC

CTCGAATGCTAACC-3', and for *Xdkk-1* sense 5'-ACAAGTACCAACCTCTGGATG C-3' and antisense 5'-ACAGGGACACAAATTCGGTTG C-3'.

**luciferase reporter assays in *Xenopus*.** Reporter plasmids were injected alone or with *VP16 Xtcf-3* RNA as indicated. Embryos were lysed and luciferase activity measured with the Luciferase Assay kit (Promega Corp., Madison, WI) as described (Vonica et al.2000).

#### **siFGF20 constructs**

The siRNA expression vector pSilencerHygro (Ambion) was used to clone DNA encoding double stranded inhibitory RNA hairpins derived from the following FGF-20 mRNA sequences: GTCGGTGCCTTCTTGGGCG (siFGF20.A), GAGAACTGGTATAATACCT (siFGF20.B) and GAGAACCGATATAATACCT (siFGF20.C; mutated bases are shown in bold).

### **Soft agar assays**

RK3E-S33YA cells were transfected using Fugene (Roche) with siRNA expression constructs. Stable transfectants were selected with 200ug/ml hygromycin for 10 days and pooled. Assays of colony formation in soft agar were performed essentially as described previously (Freshney *et al*, 1994.). Briefly, 1ml underlayers of 0.8% agar medium were prepared in 35-mm dishes by combining equal volumes of 1.6% Noble agar and 2x DMEM with 20% fetal bovine serum (Gibco). The cells were passaged once in the absence of hygromycin before performing assays. 36 hours later, plates were trypsinized and  $10^5$  cells were plated in 0.4% agar medium in triplicates. The surface was kept wet by addition of a small amount of growth medium. After 2 to 3 weeks, dishes were stained with methylene blue and colonies were photographed and counted.

## FIGURE LEGENDS

**Figure 1S.** Analysis of levels of *FGF20* mRNA by RT-PCR in human colon tumors. MSKCC refers to RNA isolated from tumors and normal colon mucosa specimens obtained from Memorial Sloan-Kettering Cancer Center. Samples obtained from Ambion represent normal mucosa and tumor specimens from the same patient. RT-PCR were obtained using 200ng of input RNA at 55o annealing temperature for a total of 40 cycles.



| Gene symbol | Gene name                                                      | Fold Change | P value | Function                                                                                  |
|-------------|----------------------------------------------------------------|-------------|---------|-------------------------------------------------------------------------------------------|
| FGF20       | Fibroblast growth factor 20                                    | 17.7        | 0.002   | Signal transduction; cell-cell signalling                                                 |
| DKK1        | Dickkopf (Xenopus laevis) homolog 1                            | 15.5        | <0.001  | Extracellular Wnt signaling antagonist                                                    |
| LY6G6D      | Lymphocyte antigen 6 complex, locus G6D (MEGT1)                | 9.4         | 0.011   | Unknown                                                                                   |
| BIK         | BCL2-interacting killer                                        | 9.2         | 0.002   | Apoptotic program; induction of apoptosis                                                 |
| EST         | GenBank acc.# AK022120                                         | 9.1         | 0.013   | Unknown                                                                                   |
| ETV5        | Ets variant gene 5                                             | 6.2         | 0.006   | Transcription factor                                                                      |
| WNT11       | Wingless-type MMTV integration site, member 11                 | 5.3         | 0.006   | Signal transduction; cell-cell signalling; embryogenesis and morphogenesis                |
| SLC2A3      | Solute carrier family 2, member 3                              | 5.2         | 0.026   | Glucose transport; carbohydrate metabolism                                                |
| SERPIND1    | Serine proteinase inhibitor, clade D, member 1                 | 5           | 0.049   | Plasma glycoprotein; proteinase inhibitor                                                 |
| SLC7A8      | Solute carrier family 7, member 8                              | 4.9         | 0.006   | Cationic amino acid transporter                                                           |
| ENPP2       | Ectonucleotide pyrophosphatase/phosphodiesterase 2 (autotaxin) | 4.7         | 0.001   | Cell motility; G-protein linked receptor signalling pathway; transcription factor binding |
| DUSP6       | Dual specificity phosphatase 6                                 | 4.6         | 0.023   | Apoptosis; MAPKKK cascade; cell cycle control; inactivation of MAPK                       |
| LMO2        | LIM domain only 2 (rhombotin-like 1)                           | 4.2         | <0.001  | Oncogenesis; developmental processes                                                      |
| SLC2A14     | Solute carrier family 2, member 14                             | 3.8         | 0.028   | Carbohydrate transport                                                                    |
| ARHGAP26    | GTPase regulator associated with FAK                           | 3.8         | 0.028   | Neurogenesis; cell growth/maintenance                                                     |
| GAD1        | Glutamate decarboxylase 1 (brain, 67kD)                        | 3.6         | 0.002   | Synaptic transmission; glutamate decarboxylation                                          |
| FUT1        | Fucosyltransferase 1                                           | 3.5         | 0.035   | Carbohydrate metabolism                                                                   |
| QPTC        | Glutaminyl-peptide cyclotransferase (glutaminyl cyclase)       | 3.5         | <0.001  | Protein modification                                                                      |
| RBP1        | Cellular Retinol-binding protein 1                             | 3.3         | 0.024   | Retinoid binding; vitamin A metabolism                                                    |
| ABCB1       | MDR/TAP member 1                                               | 3.1         | 0.001   | Drug resistance; small molecule transport                                                 |
| STC1        | stanniocalcin                                                  | 3           | 0.027   | Calcium ion homeostasis, cell surface receptor, cell-cell signaling                       |
| CHODL       | chondrolectin                                                  | 3           | 0.01    | Heterophilic cell adhesion                                                                |
| SERPINI1    | neuroserpin                                                    | 2.9         | 0.023   | Central nervous system development; peripheral nervous system development                 |
| EEF1A2      | translation elongation factor 1 alpha 2                        | 2.8         | 0.02    | Protein biosynthesis; translational elongation                                            |
| TNC         | tenascin C                                                     | 2.8         | 0.007   | Cell adhesion                                                                             |
| ENC1        | BTB-like domain, ectodermal neural cortex                      | 2.7         | 0.002   | Development; neurogenesis                                                                 |

|        |                                           |     |        |                                                                                                          |
|--------|-------------------------------------------|-----|--------|----------------------------------------------------------------------------------------------------------|
| PLK2   | serum-inducible kinase                    | 2.7 | 0.006  | Protein amino acid phosphorylation; cell cycle; positive regulation of I-kappaB kinase/NF-kappaB cascade |
| IRS1   | Insulin receptor substrate 1              | 2.6 | 0.002  | Signal transduction                                                                                      |
| TBX3   | T-box 3                                   | 2.5 | <0.001 | skeletal development; regulation of transcription from Pol II promoter; morphogenesis                    |
| MSX2   | msh homeobox homolog 2                    | 2.5 | <0.001 | skeletal development; regulation of transcription, DNA-dependent; development                            |
| CXCR4  | Chemokine receptor CXCR4                  | 2.5 | 0.011  | Activation of MAPK; apoptosis; chemotaxis; inflammatory response                                         |
| MSX1   | msh homeo box homolog 1                   | 2.5 | 0.001  | skeletal development /// regulation of transcription, DNA-dependent /// development                      |
| CDH1   | E-cadherin                                | 2.4 | 0.024  | Cell adhesion; homophilic cell adhesion                                                                  |
|        | clone MGC:4655 IMAGE:3530459              | 2.4 | 0.017  | Protein amino acid glycosylation                                                                         |
| RHOB   | ras homolog gene family, member B         | 2.3 | 0.011  | Rho protein signal transduction /// cell growth and/or maintenance                                       |
| IBRDC3 |                                           | 2.3 | 0.002  | Unknown                                                                                                  |
| CD9    | CD9 antigen                               | 2.3 | 0.006  | cell motility; cell adhesion                                                                             |
| HOXA1  | homeo box A1                              | 2.3 | 0.001  | Regulation of transcription, DNA-dependent; development                                                  |
| CCND1  | Cyclin D1                                 | 2.3 | 0.02   | regulation of cell cycle; cell growth and/or maintenance                                                 |
| MYB    | v-myb                                     | 2.3 | <0.001 | Regulation of transcription, DNA-dependent; cell growth and/or maintenance                               |
| EFEMP1 | fibulin-like extracellular matrix 1       | 2.3 | 0.009  | Visual perception                                                                                        |
| THBD   | Thrombomodulin                            | 2.2 | 0.04   | Blood coagulation                                                                                        |
| DNCI1  | dynein                                    | 2.2 | <0.001 | motor activity                                                                                           |
|        | EST                                       | 2.2 | 0.02   | Unknown                                                                                                  |
| CALCB  | calcitonin-related polypeptide            | 2.2 | 0.0003 | Calcium ion homeostasis; signal transduction                                                             |
| PPM2C  | pyruvate dehydrogenase phosphatase        | 2.1 | 0.025  | Protein amino acid dephosphorylation                                                                     |
| C9orf3 | hypetherical protein                      | 2.1 | 0.005  | Proteolysis and peptidolysis                                                                             |
| LBH    | ortholog of mouse limb-bud and heart gene | 2.1 | 0.046  |                                                                                                          |
| GPR49  | G-protein couple recepto 49               | 2.1 | 0.006  | G-protein coupled receptor protein signaling pathway                                                     |
| PKP2   | plakophilin 2                             | 2.1 | <0.001 | Cell-cell adhesion                                                                                       |
| KRT18  | keratin 18                                | 2   | 0.005  |                                                                                                          |
| NPTX1  | neuronal pentraxin 1                      | 2   | 0.001  |                                                                                                          |

|           |                                                                            |      |        |                                                                                                       |
|-----------|----------------------------------------------------------------------------|------|--------|-------------------------------------------------------------------------------------------------------|
| KAL1      | Kallmann syndrome 1                                                        | 2    | 0.004  | Cell motility /// chemotaxis /// cell adhesion /// axon guidance                                      |
| ESPRED2   | Similar to sprouty homolog 3                                               | 2    | 0.005  | Development; regulation of signal transduction                                                        |
| BAMBI     | BMP and activin membrane-bound inhibitor homolog ( <i>Xenopus laevis</i> ) | 2    | 0.003  |                                                                                                       |
| FLJ20152  | hypothetical protein FLJ20152                                              | 2    | 0.033  | Unknown                                                                                               |
| AASS      | aminoadipate-semialdehyde synthase                                         | 2    | 0.015  | Electron transport                                                                                    |
| LEF1      | lymphoid enhancer-binding factor 1                                         | 2    | 0.003  | Regulation of transcription, DNA-dependent /// Wnt receptor signaling pathway                         |
| SLCA5     | solute carrier family 7, member 5                                          | 2    | 0.004  | Amino acid metabolism; amino acid transport                                                           |
| SOX13     | SRY (sex determining region Y)-box 13                                      | 2    | 0.017  | Regulation of transcription, DNA-dependent; morphogenesis                                             |
| F12       | coagulation factor XII (Hageman factor)                                    | 2    | 0.011  | Proteolysis and peptidolysis                                                                          |
| FZD7      | frizzled homolog 7                                                         | 2    | 0.009  | G-protein coupled receptor protein signaling pathway; frizzled and Wnt signaling pathway; development |
| BCL11B    | B-cell CLL/lymphoma 11B (zinc finger protein)                              | -2   | 0.031  | Regulation of transcription, DNA-dependent                                                            |
| MSH5      | mutS homolog 5 ( <i>E. coli</i> )                                          | -2   | 0.011  | DNA metabolism; mismatch repair                                                                       |
| CELSR1    | G-2 and S-phase expressed 1                                                | -2   | 0.004  | homophilic cell adhesion; development                                                                 |
| N2N       | similar to NOTCH2 protein                                                  | -2   | 0.026  | Unknown                                                                                               |
| KIAA0590  | KIAA0590 gene product                                                      | -2.1 | 0.006  | Unknown                                                                                               |
| BASPI     | brain abundant, membrane signal protein 1                                  | -2.1 | 0.005  | Cytoskeleton; plasma membrane                                                                         |
| ISYNA1    | myo-inositol 1-phosphate synthase                                          | -2.2 | <0.001 | Myo-inositol biosynthesis /// phospholipid biosynthesis                                               |
|           | unknown                                                                    | -2.2 | 0.025  |                                                                                                       |
| FLNA      | filamen A alpha                                                            | -2.3 | 0.004  | Cell motility; cell surface receptor linked signal transduction; neurogenesis                         |
| LOC283232 | hypothetical protein LOC283232                                             | -2.4 | 0.016  | Unknown                                                                                               |
| SNAI2     | snail homolog 2 ( <i>Drosophila</i> )                                      | -2.4 | <0.001 | Negative regulation of transcription from Pol II promoter; development                                |
| IGFBP5    | insulin-like growth factor binding protein 5                               | -2.8 | 0.002  | Regulation of cell growth; signal transduction                                                        |
| SEC6L1    | SEC6-like 1 ( <i>S. cerevisiae</i> )                                       | -2.9 | 0.02   | Intracellular protein transport; exocytosis                                                           |
| C10orf10  | decidual protein induced by progesterone                                   | -3.0 | 0.04   | Unknown                                                                                               |
| ZNF492    | zinc finger protein 492                                                    | -9.9 | 0.01   | Regulation of transcription                                                                           |

**Table IS.** List of genes regulated >2-fold by mutant  $\beta$ -catenin in 293Top cells.
